# Supplementary material
Source: PubMed Central journal article supplement (PMC9710186)
Supplement: mmc1.pdf [file mmc1.pdf]

## Supplementary Materials

### Table of Contents

|                                                                        |   |
|------------------------------------------------------------------------|---|
| Supplementary Figure 6: Race distribution by site.....                 | 2 |
| Supplementary Figure 7: Relapse-free survival by relapse status.....   | 3 |
| Supplementary Figure 8: Severity measures and treatment selection..... | 4 |
| Supplementary Figure 9: Survival adjusted for severity.....            | 5 |
| Appendix: Participating sites and investigators.....                   | 6 |

Supplementary Figures

**Figure 6. Race distribution by site.**

The number of patients submitted from each site, categorized by race and the distribution of Black, White and Other participants at each participating site.

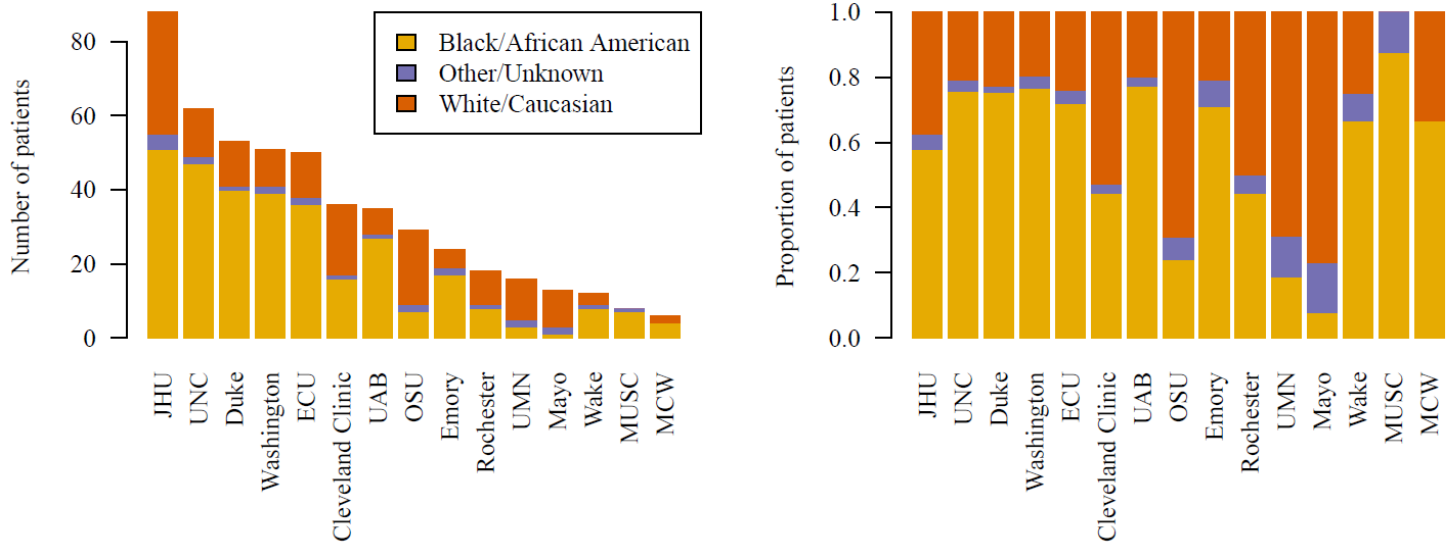

**Figure 7: Relapse-free survival by relapse status**

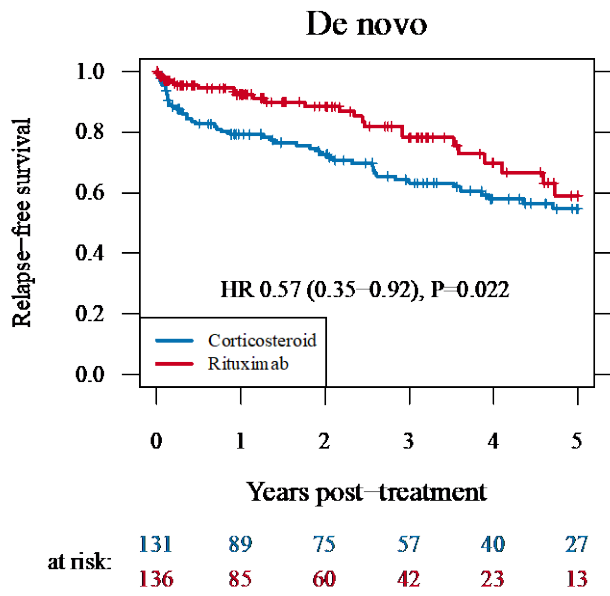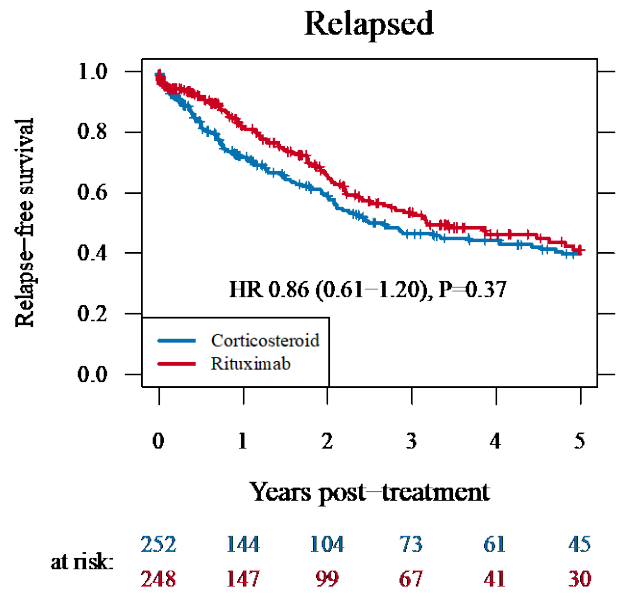

**Figure 8: Severity measures and treatment selection**

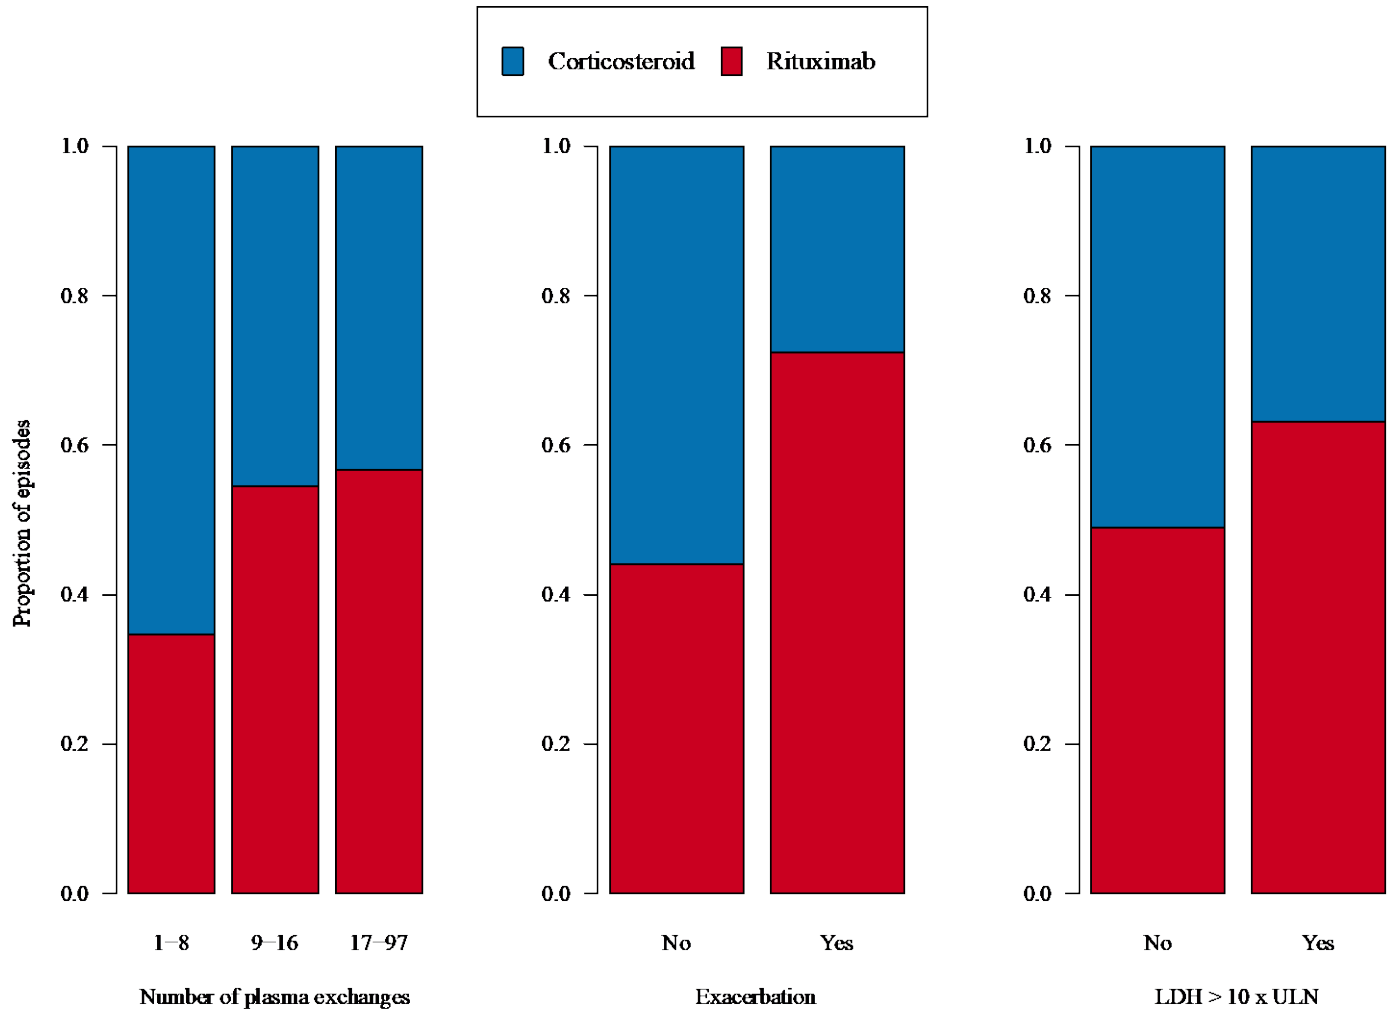

**Figure 9: Survival adjusted for severity**

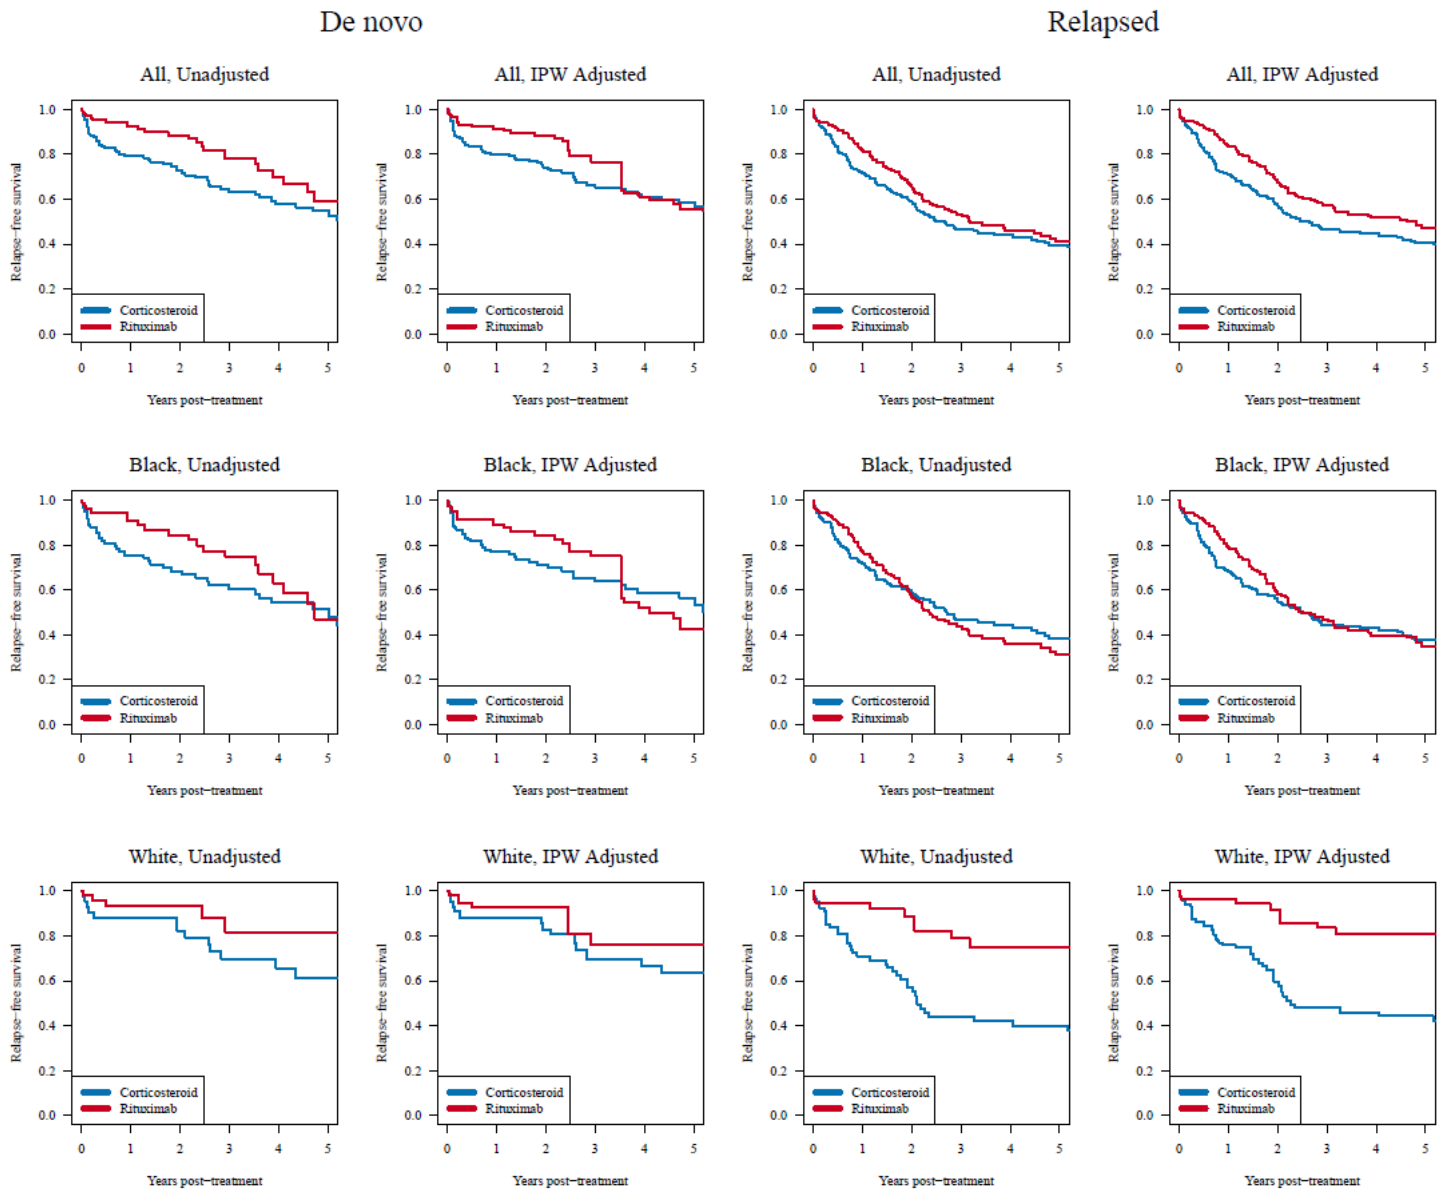

**Appendix: Participating sites and investigators**

| Investigator Name      | Registry Site Name (may not reflect investigators' current affiliation) | City, State     |
|------------------------|-------------------------------------------------------------------------|-----------------|
| Keith McCrae           | Cleveland Clinic                                                        | Cleveland, OH   |
| Ara Metjian            | Duke University                                                         | Durham, NC      |
| Kristen Bagby          | Duke University                                                         | Durham, NC      |
| Darla Liles            | East Carolina University                                                | Greenville, NC  |
| Susan Eubanks          | East Carolina University                                                | Greenville, NC  |
| Ana G Antun            | Emory University                                                        | Atlanta, GA     |
| Shruti Chaturvedi      | Johns Hopkins University                                                | Baltimore, MD   |
| Rahil Kohli            | Johns Hopkins University                                                | Baltimore, MD   |
| Harshvardhan Upreti    | Johns Hopkins University                                                | Baltimore, MD   |
| Angela Liu             | Johns Hopkins University                                                | Baltimore, MD   |
| Meera Sridharan        | Mayo Clinic                                                             | Rochester, MN   |
| Ronald S. Go           | Mayo Clinic                                                             | Rochester, MN   |
| Lisa Baumann Kreuziger | Medical College of Wisconsin, Versiti Blood Research Institute          | Milwaukee, WI   |
| Todd Clover            | Medical College of Wisconsin                                            | Milwaukee, WI   |
| Ming Yeong Lim         | Medical University of South Carolina                                    | Charleston, SC  |
| Spero R Cataland       | The Ohio State University                                               | Columbus, OH    |
| Camila Masias          | The Ohio State University                                               | Columbus, OH    |
| X Long Zheng           | University of Alabama, Birmingham                                       | Birmingham, AL  |
| Nicole Kocher          | University of Alabama, Birmingham                                       | Birmingham, AL  |
| Radhikha Gangaraju     | University of Alabama, Birmingham                                       | Birmingham, AL  |
| Marshall A Mazepa      | University of Minnesota                                                 | Minneapolis, MN |
| Michael Evans          | University of Minnesota                                                 | Minneapolis, MN |
| Elizabeth Davis        | University of Minnesota                                                 | Minneapolis, MN |
| Andrew Johnson         | University of Minnesota                                                 | Minneapolis, MN |

|                   |                              |                   |
|-------------------|------------------------------|-------------------|
| Jay S Raval       | University of New Mexico     | Albuquerque, NM   |
| Yara A Park       | University of North Carolina | Chapel Hill, NC   |
| Gustaaf de Ridder | University of North Carolina | Chapel Hill, NC   |
| Briana Gibson     | University of North Carolina | Chapel Hill, NC   |
| Raj Kasthuri      | University of North Carolina | Chapel Hill, NC   |
| Frank Akwaa       | University of Rochester      | Rochester, NY     |
| Andrew Farland    | Wake Forest University       | Winston Salem, NC |
| Ryan Woods        | Wake Forest University       | Winston Salem, NC |
| J. Evan Sadler    | Washington University        | St Louis, MO      |
